# Supplementary material for: Corticosteroids Augment BRAF Inhibitor Vemurafenib Induced Lymphopenia and Risk of Infection
Source: PubMed Central journal article supplement (PMC4405567; doi:10.1371/journal.pone.0124590), 2015-04-21

# Supplemental Figure 1. Neutrophil and eosinophil counts before and during therapy

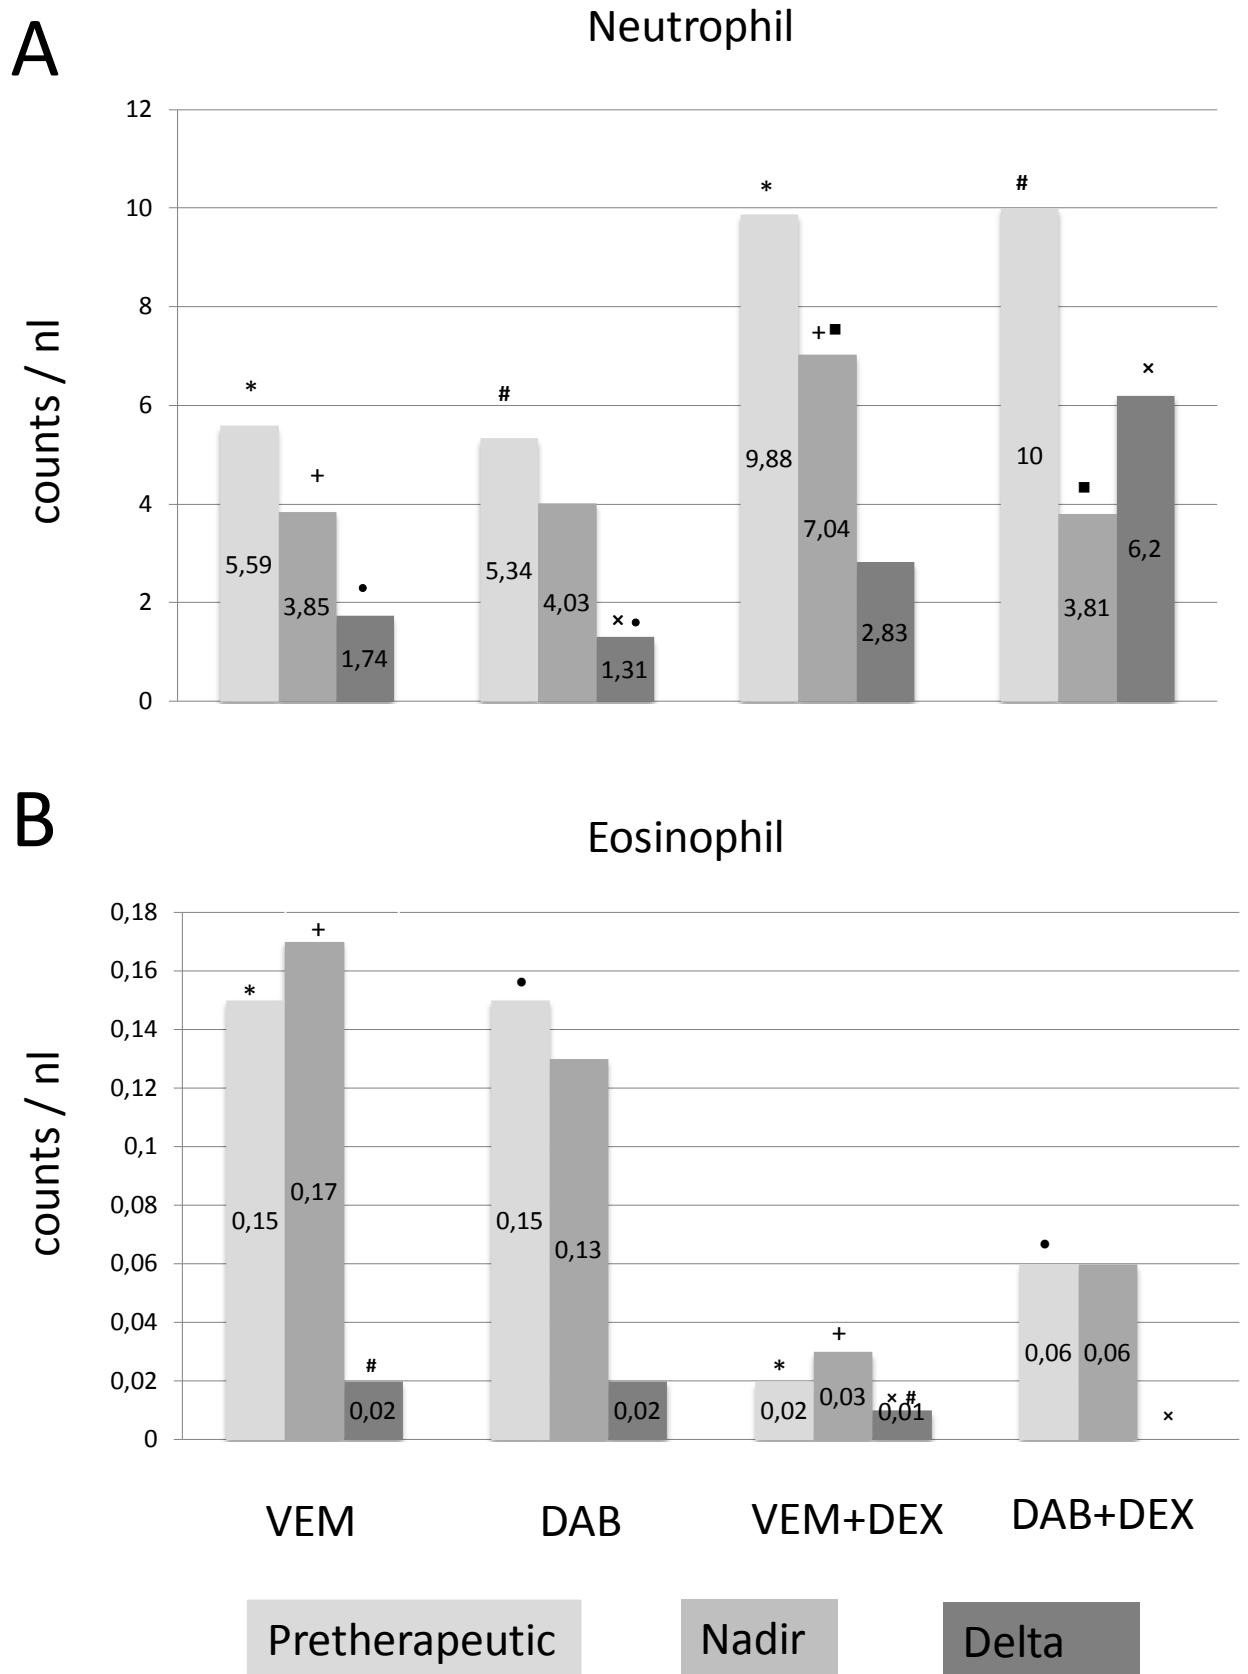

Supplement: pone.0124590.s001.pdf [file pone.0124590.s001.pdf]
